RESEARCH ARTICLE

# Estrogenic Activity of Mineral Oil Aromatic Hydrocarbons Used in Printing Inks

Patrick Tarnow\*, Christoph Hutzler, Stefan Grabiger, Karsten Schön, Tewes Tralau, Andreas Luch

German Federal Institute for Risk Assessment (BfR), Department of Chemical and Product Safety, Berlin, Germany, Max-Dohrn-Strasse 8–10, 10598, Berlin, Germany

\* [Patrick.Tarnow@bfr.bund.de](mailto:Patrick.Tarnow@bfr.bund.de)

## Abstract

The majority of printing inks are based on mineral oils (MOs) which contain complex mixtures of saturated and aromatic hydrocarbons. Consumer exposure to these oils occurs either through direct skin contacts or, more frequently, as a result of MO migration into the contents of food packaging that was made from recycled newspaper. Despite this ubiquitous and frequent exposure little is known about the potential toxicological effects, particularly with regard to the aromatic MO fractions. From a toxicological point of view the huge amount of alkylated and unsubstituted compounds therein is reason for concern as they can harbor genotoxicants as well as potential endocrine disruptors. The aim of this study was to assess both the genotoxic and estrogenic potential of MOs used in printing inks. Mineral oils with various aromatic hydrocarbon contents were tested using a battery of *in vitro* assays selected to address various endpoints such as estrogen-dependent cell proliferation, activation of estrogen receptor  $\alpha$  or transcriptional induction of estrogenic target genes. In addition, the comet assay has been applied to test for genotoxicity. Out of 15 MOs tested, 10 were found to potentially act as xenoestrogens. For most of the oils the effects were clearly triggered by constituents of the aromatic hydrocarbon fraction. From 5 oils tested in the comet assay, 2 showed slight genotoxicity. Altogether it appears that MOs used in printing inks are potential endocrine disruptors and should thus be assessed carefully to what extent they might contribute to the total estrogenic burden in humans.

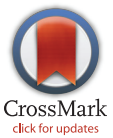

CrossMark  
click for updates

## OPEN ACCESS

**Citation:** Tarnow P, Hutzler C, Grabiger S, Schön K, Tralau T, Luch A (2016) Estrogenic Activity of Mineral Oil Aromatic Hydrocarbons Used in Printing Inks. PLoS ONE 11(1): e0147239. doi:10.1371/journal.pone.0147239

**Editor:** Jong Seong Khim, Seoul National University, REPUBLIC OF KOREA

**Received:** October 16, 2015

**Accepted:** December 30, 2015

**Published:** January 15, 2016

**Copyright:** © 2016 Tarnow et al. This is an open access article distributed under the terms of the [Creative Commons Attribution License](https://creativecommons.org/licenses/by/4.0/), which permits unrestricted use, distribution, and reproduction in any medium, provided the original author and source are credited.

**Data Availability Statement:** All relevant data are within the paper and its Supporting Information files.

**Funding:** This work was supported by an intramural grant at the German Federal Institute for Risk Assessment (SFP1322-526).

**Competing Interests:** The authors have declared that no competing interests exist.

## Introduction

While most readers will read this article as PDF or a print-out thereof, paper- and cardboard-based printing is far from giving its swan song. The inks used can be categorized into water-based, solvent-based and mineral oil (MO)-based. With more than 420,000 t used in 2012 the latter still constitute the majority of inks used for printing in Europe and probably world-wide [1]. Applications comprise, amongst others, newspaper printing as well as the labeling and decoration of food packaging. Hence it comes as little surprise that residues of MOs are detectable in cardboard packages for food. In addition, the cardboard used is often sourced from recycled material which contains large quantities of newspaper and consequently some of its printing

inks. Without further barriers the respective MOs can migrate into the packaged foodstuffs [2] and compounds from mineral oils have indeed been detected in dry foods such as rice and noodles in concentrations as high as tens to hundreds of mg/kg [3–5]. From a chemical point of view MOs consist of a complex mixture of several hundred substances. Depending on their structural features these are commonly attributed to two fractions, that is mineral oil saturated hydrocarbons (MOSHs) or mineral oil aromatic hydrocarbons (MOAHs). The former encompass naphthenes, n-alkanes and iso-alkanes, whereas the latter contain highly alkylated mono- and polycyclic aromatic hydrocarbons (PAHs) [6, 7]. The potential health hazard, particularly of MOAHs in foodstuffs is a matter of ongoing debate, which is complicated further by the fact that there are hardly any data on the individual compounds or their toxicological properties. So far the discussion has mainly focused on the potential carcinogenic properties of PAHs, the obvious reason being their tendency for DNA adduct formation subsequent to metabolic activation [8]. However, given the structural plethora of the chemical space comprised by MOAHs another concern is endocrine disruption. Yet, this point has so far not been addressed.

“Endocrine disruptors” are defined as exogenous substances or mixtures that alter functions of the endocrine system and consequently cause adverse health effects in an intact organism, or its progeny [9]. The *in vitro* assessment of such substances remains a challenge due to limited experimental accessibility of the various hormone systems by means of high throughput testing, hormone homeostasis and the multitude of signaling pathways involved. Although there has been some progress, targeted testing is still pretty much limited to the estrogenic, androgenic, thyroid and steroidogenic systems, with the majority of *in vitro* tests addressing the androgenic and estrogenic signaling cascades. Those systems rely on receptor mediated signaling cascades with xenoestrogens usually acting as ligands for the estrogen receptors (ER, subtypes  $\alpha$  and  $\beta$ ). Following their stimulation (*i.e.*, by 17 $\beta$ -estradiol (E2) or a structural homologue) these receptors homodimerize and act as ligand activated transcription factors that bind to so called estrogen responsive elements (EREs) within the promoters of their target genes [10]. The respective signaling cascades will influence physiological processes as diverse as reproduction, bone integrity or behavior, and accordingly ER $\alpha$  is expressed not only in tissues with reproductive function (*e.g.*, uterus, ovary, mammary gland, testes and prostate) but in a variety of other organs such as bone, liver, heart and brain [11]. Perturbation of ER $\alpha$  signaling is involved in several types of cancer [12] and while binding of xeno- or phytoestrogens does not necessarily constitute a health concern it is a potential hazard indicator [13]. The more so, as mixtures of estrogenic chemicals can have additive effects [14]. Given the high exposure of consumers against MOs used in printing inks this study therefore assessed the xenoestrogenic potential using a battery of *in vitro* assays.

## Materials and Methods

### Chemicals

Cell culture media were purchased from PAN Biotech (Aidenbach, Germany), charcoal treated fetal calf serum (FCS) was obtained from PAA (Cölbe, Germany). Substrates for the luciferase assays (D-Luciferin, ATP) and reducing agent DTT were obtained from PJK (Kleinblittersdorf, Germany). Bulk chemicals, 17 $\beta$ -estradiol (E2), 3-(4,5-dimethylthiazol-2-yl)-2,5-diphenyltetrazolium bromide (MTT), dichloromethane (>99.8%) and n-hexane (>97.0%) were purchased from Sigma Aldrich (Munich, Germany). Standards for MOSH analysis were n-undecane (n-C11), n-tridecane (n-C13), cyclohexyl-cyclohexane and 5 $\alpha$ -cholestane (Cho); those for MOAH analysis were pentyl-benzene (5B), 1- and 2-methylnaphthalene (1-/2-MN), 1,3,5-tri-*tert*-butylbenzene (TBB) and perylene (Per; all from Sigma Aldrich). MOs were kind gifts from the Chemical and Veterinary Investigations Office in Stuttgart, Germany, and the Official Food

Control Authority of the Canton of Zürich, Switzerland, or in house samples, respectively. Test substances for the various assays were used as provided with the exception of E2 which was dissolved in dimethyl sulfoxide (DMSO) prior to use.

### E-screen

The human mammary carcinoma MCF-7 cell line was derived from the ATCC (HTB-22). For the assay 5000 cells per well were seeded into 24-well plates using Dulbecco's modified Eagle medium (DMEM) supplemented with 10% FCS. The cells were then allowed to attach over 6 h before being subsequently washed with hormone-free DMEM (HF-DMEM, phenol red-free DMEM supplemented with 5% charcoal stripped FCS) and subjected to hormone deprivation for another 72 h. Finally the cells were exposed to the respective MO or analytical fractions thereof for 5 days before being analyzed using cell viability as the final endpoint. Viability was assessed based on a standard MTT assay (0.5 mg/ml MTT, 2 h of incubation), using a Synergy HT plate reader from BioTek (Bad Friedrichshall, Germany) to assess the reduction of MTT to formazan at 595 nm. Data were normalized to the solvent control (set as 0%) and to 1 nM E2 treated cells (set as 100%).

### Gene expression analysis of selected genes using quantitative RT-PCR

The expression of selected genes in MCF-7 cells was analyzed by quantitative RT-PCR. Cells were seeded into 12-well plates using hormone-free medium and a concentration of  $2 \times 10^5$  cells per ml and well and left to settle for 48 h before being stimulated with dispersed MO or preparative fractions of MO for a total of 24 h. Following chemical treatment cells were washed in PBS and the total RNA was extracted using Trizol (Invitrogen, Carlsbad, CA, USA). The extracted RNA (1  $\mu$ g) was then reversely transcribed into cDNA, using a cDNA synthesis kit (Applied Biosystems, Foster City, CA, USA) and relative transcript levels were determined in triplicate using presynthesized Taqman probes (Applied Biosystems, Foster City, CA, USA) and quantitative RT-PCR. Probes used were RPLP0 (Hs99999902\_m1), CYP1A1 (Hs00153120\_m1), CYP1B1 (Hs00164383\_m1), PGR (Hs01556707\_m1), TFF1 (Hs00907239\_m1) and GREB1 (Hs00536409\_m1).

### Reporter gene assay

Transactivation assays were performed as described previously [15], with some minor modifications. In brief, hER $\alpha$ -HeLa-9903 cells (JCRB-No. 1318, as available from the Japanese Collection of Research Bioresources Bank) were grown in a white 96-well plate in MEM supplemented with 10% charcoal treated FCS and kanamycin (60 mg/l), seeding  $10^4$  cells per 100  $\mu$ l and well. Cells were then left to rest for some 24 h before being stimulated with MO or E2 for another 20 h. Cellular lysis was then initiated *in situ* by adding 50  $\mu$ l of lysis buffer (0.1 M tris-acetate, 2 mM EDTA, and 1% Triton-X, pH 7.8) to each well and allowed to commence for 20 minutes at room temperature and moderate shaking. The activity of any luciferase expressed was then quantified based on luminescence levels following the addition of buffer (150  $\mu$ l; 25 mM glycylglycine, 15 mM MgCl<sub>2</sub> and 4 mM EGTA, 1 mM DTT, 1 mM ATP, pH 7.8) and reagent solution (50  $\mu$ l; 25 mM glycylglycine, 15 mM MgCl<sub>2</sub> and 4 mM EGTA, 0.2 mM luciferin, pH 7.8), respectively. All values were corrected for the mean of the negative control and then related to the positive control which was set to 100%. All experiments were conducted at least in triplicate, using a Synergy HT plate reader (BioTek, Bad Friedrichshall, Germany) equipped with an automatic injector unit.

## Single-cell electrophoresis assay (comet assay)

Normal human epithelial keratinocytes (NHEKs) were isolated by overnight trypsin digestion from juvenile foreskins and subsequently cultivated in KBM-2 supplemented with bovine pituitary extract (4  $\mu\text{l/ml}$ ), EGF (0.125 ng/ml), insulin (5  $\mu\text{g/ml}$ ), hydrocortisone (0.33  $\mu\text{g/ml}$ ), epinephrine (0.39  $\mu\text{g/ml}$ ), transferrin (10  $\mu\text{g/ml}$ ) and  $\text{CaCl}_2$  (60  $\mu\text{M}$ ) (PromoCell, Heidelberg, Germany). For experiments, cells were then seeded in 12-well dishes and left to grow until reaching confluency. Prior to MO application the medium was changed for at least 24 h to KBM supplemented with bovine pituitary extract and  $\text{CaCl}_2$  only, since EGF and other growth factors are known to partially repress the aryl hydrocarbon receptor (AHR) mediated response, thus interfering with the assay [16]. Exposure to test mixtures lasted for 24 h, with aphidicolin (APC, 5  $\mu\text{g/ml}$ ) being added after some 20 h, followed by a comet assay as described previously [17]. In brief, cells from each well were trypsinized, pelleted, redissolved in 20  $\mu\text{l}$  of PBS, mixed with 300  $\mu\text{l}$  of 0.5% (w/v) low melting point agarose (Cambrex, East Rutherford, NJ, USA) and applied to two coated microscope slides. The cells were then lysed overnight at 4°C in lysis buffer (2.2 M NaCl, 8.9 mM  $\text{Na}_2\text{EDTA}$ , 8.9 mM Tris, 10% DMSO, 0.1% Triton X-100, pH 10) followed by 20 minutes of equilibration in alkaline electrophoresis buffer (1 M NaOH, 20 mM  $\text{Na}_2\text{EDTA}$ , pH > 13) and electrophoresis for 30 minutes at 30 V and 450 mA. After neutralization in 0.4 mM Tris buffer (pH 7.5) the slides were finally dehydrated in ethanol and dried for later analysis. For comet scoring, DNA was stained with SYBR gold and the relative intensity of any DNA tails was assessed using a commercial software package (CometImager V2.2.1, Meta-Systems, Altlüßheim, Germany).

## Characterization of MOs by online-LC-GC-FID and GCxGC-ToF-MS

MOs were analyzed according to Biederman *et al.* using an LC-GC 9000 system (Brechtbühler, Schlieren, Switzerland) equipped with a LiChrospher Si 60 LC column (250 x 20 mm i.d., 5  $\mu\text{m}$ ; Bischoff Analytics, Germany), a ZB-1HT Inferno GC column (15 m x 0.25 mm i.d., 0.1  $\mu\text{m}$ ; Phenomenex, Aschaffenburg, Germany) and an uncoated silica precolumn (10 m x 0.53 mm i.d.) [2, 3]. Separated fractions of MOAHs and MOSHs were quantified by integration using cyclohexyl-cyclohexane and 1-/2-MN as internal quantification standards for MOSHs and MOAHs, respectively.

MOAH fractions were characterized further by two dimensional GCxGC-ToF-MS using a Pegasus 4D-system (LECO, Mönchengladbach, Germany) and ultra-pure helium (purity  $\geq 99.999\%$ , Linde, Pullach, Germany) as carrier gas. Sample injections were performed in splitless mode using a split/splitless injector (Agilent, Waldbronn, Germany) at a constant temperature of 275°C and then subjected to separation at a constant flow of 1 ml/min using a nonpolar column (RXI-5Sil MS, 30 m x 0.25 mm i.d., 0.25  $\mu\text{m}$ , Restek, Bad Homburg, Germany), and a polar column (RXI-17Sil MS, 1 m x 0.18 mm i.d., 0.18  $\mu\text{m}$ , Restek) for the first and second dimension, respectively. For the first oven heating started at 70°C for 1 minutes, followed by successive ramping to 120°C (15°C/min), 170°C (8°C/min), 270°C (2°C/min) and 330°C (15°C/min, ramp held for 8 min). The same heating ramps were used for the programs of the secondary oven and the modulator, except for the use of offsets of 5°C and 15°C for oven and modulator, respectively. The program for the modulation time was as follows: 3.5 sec from the start up to 13.22 min, 4 sec from 12.22 min up to 26.62 min, 4.5 sec from 26.62 min up to 49.87 min, 8 sec from 49.89 min to 52.20 min and 10 sec from 52.20 min up to the end of the analysis. Subsequent mass analysis was performed using a temperature of 205°C for the ion source and electron impact ionisation at 70 eV. The mass range was set to 35 to 500 amu in the full scan mode with an acquisition rate of 200 full scans per second.

## Preparation of MOSH and MOAH fractions from MOs

In total 10  $\mu\text{l}$  of MO were subsequently separated into MOSHs and MOAHs using the LC of the LC-GC 9000 system equipped with a LiChrospher Si 60 column, collecting the samples manually into glass vials. Fractions were eluted using a hexane (MOSHs) and dichloro-methane/hexane gradient (MOAHs), respectively. For each preparation 10  $\mu\text{l}$  MO were mixed with 990  $\mu\text{l}$  of n-hexane, followed by 10 subsequent injections of 50  $\mu\text{l}$  each using the decoupled LC-GC system for collection of the MOAH fractions into ice cold glass vials. The combined fractions were then concentrated in a rotary evaporator using 500  $\mu\text{l}$  of DMSO as keeper and kept for further use in the toxicological assays.

## Results

### Estrogenic activity of MOs

The xenoestrogenic potential of MOs was initially assessed using different *in vitro* assays, namely the so called E-screen, an estrogen responsive luciferase assay and by transcriptional analysis of selected estrogen responsive genes. The first uses the estrogen-dependent proliferation of mammary carcinoma MCF-7 cells and thus provides a physiological readout, while the second and the third assay indicate interaction with ER $\alpha$  and activation of ER-triggered gene responses, respectively. Gene targets selected for the transcriptional assay comprised the progesterone receptor (*PGR*), trefoil factor 1 (*TFF1* or *pS2*) and the estrogen-dependent growth regulator in breast cancer 1 (*GREB1*). All genes are well established and thus frequently used estrogen response genes. The *TFF1* promoter contains a consensus ERE and two ERE half sites [18]. *GREB1* contains 3 consensus EREs in the distant promoter located 1.6–21 kb upstream the transcription start site [19]. The *PGR* gene contains several imperfect EREs ranging from 311 kb upstream to 4 kb downstream the transcription start site which confer to estrogen responsiveness of *PGR* expression [20].

A total of 15 different MOs were tested in the E-screen at concentrations of 1 and 0.1  $\mu\text{l}/\text{ml}$  (Fig 1A). All oils, except two (*i.e.*, MO 6 and MO 7), had a notable stimulating effect on cell proliferation. For MOs 1, 2, 3, 8 and 9 stimulation of cell proliferation followed an apparent dose dependency ( $p < 0.001$  using a student's t-test), whereas other oils such as MOs 4, 10, 11 and 12 exerted a maximal proliferative effect at both concentrations tested. Five oils were found to be cytotoxic. This included MO 6 at both concentrations, as well as MOs 5, 13, 14 and 15 at 1  $\mu\text{l}/\text{ml}$ .

The xenoestrogenic potential of MOs was further investigated using hER $\alpha$ -HeLa-9903 cells, a well-established reporter cell line that expresses firefly luciferase under the control of a five-fold ERE (Fig 1B). The results showed a statistically significant induction of luciferase activity for all but three MOs, thus largely confirming the data from the E-screen. No luminescence induction was seen for the previously cytotoxic MOs 5 and 6 as well as the weakly proliferative MO 7. Notably, the maximum levels of induction (*i.e.*, MO 13, 14 and 15) came close the half-maximal stimulation of the positive control, equivalent to 100 pM of E2.

Likewise the transcriptional assay confirmed estrogen-dependent gene responsiveness for several of the MOs, particularly sample numbers 1 and 2 and 9 to 15 (Fig 1C). Nevertheless, the effects varied depending on the target transcript. The mRNA levels of *PGR* and *GREB* generally featured a moderate to weak induction, while upregulation of *TFF1* was more pronounced when compared to the E2 treated positive control. Treatment with MOs 11 to 15 resulted in an induction of *TFF1* equivalent to stimulation with 10 nM E2. The results were confirmed further using two additional estrogen-dependent genes, that is *HSPB8* and *CTSD* (S2 Fig). Transcription of *HSPB8* is regulated by nongenomic estrogen responses and *CTSD*

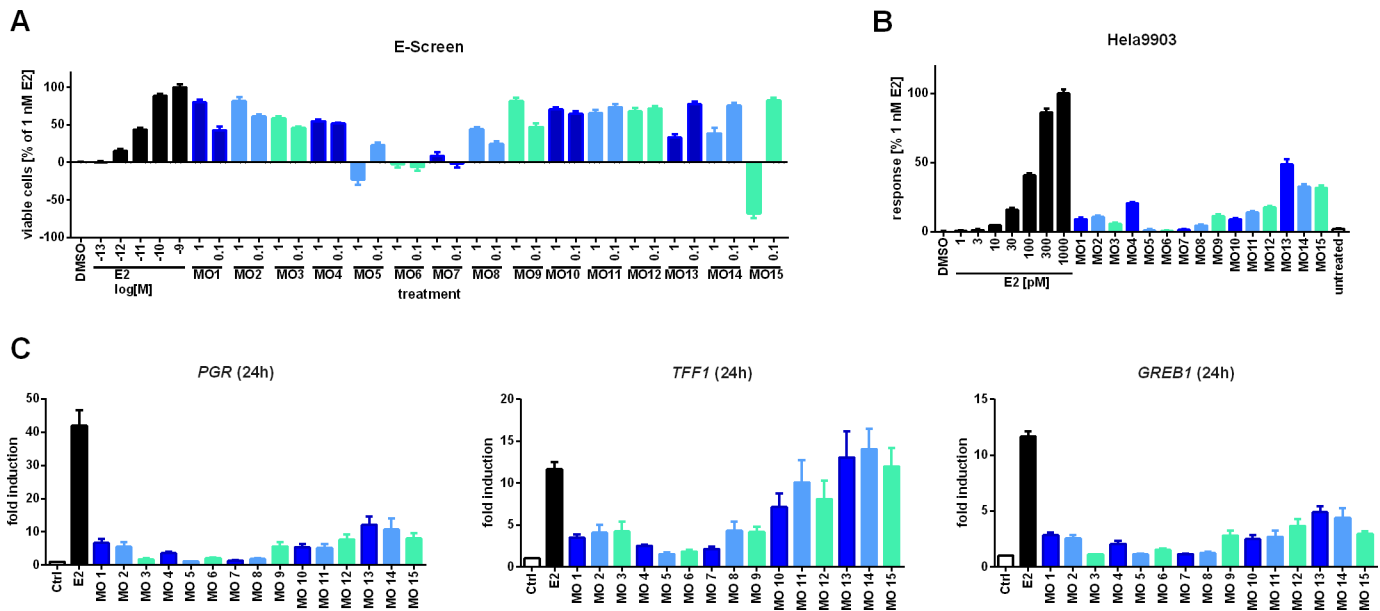

**Fig 1. Estrogenic effects of MOs in the E-screen, the hER $\alpha$ -HeLa-9903 assay and induction of ER responsive transcripts as indicated.** Proliferation assays with MCF-7 cells were performed subsequent to cellular stimulation with dispersions of 1 and 0.1  $\mu$ l/ml MO (eq. to dil. of 1:1,000 and 1:10,000) or E2 as indicated (A). For the reporter gene assay hER $\alpha$ -HeLa-9903 cells were stimulated for 20 h with the indicated amounts of E2 or 1  $\mu$ l/ml MO dispersed in medium, followed by cellular lysis and measurement of firefly luciferase activity (B). Transcriptional assays were following a 24-h exposure to 1  $\mu$ l/ml MO or 10 nM E2, respectively (C). Data in all assays represent the mean  $\pm$  SEM from at least three independent experiments. For the E-screen and the reporter gene assay data were corrected to accommodate the background of untreated cells and subjected to normalization using the effect of 1 nM E2. Likewise gene expression was normalized using *RPLP0* and the solvent control as references. Abbreviations: *PGR*, progesterone receptor (gene); *TFF1*, trefoil factor (gene); *GREB1*, estrogen-dependent growth regulator in breast cancer 1 (gene).

doi:10.1371/journal.pone.0147239.g001

contains EREs located 9 kb upstream of its transcription start site [21, 22]. As with the other genes transcription was found to be affected by several of the MOs tested, inducing *HSPB8* up to twofold, and *CTSD* up to threefold (S2 Fig).

## Composition of MOs

To further characterize the fractions responsible for the observed xenoestrogenic activity the MOs were separated using HPLC (Table 1). The data confirmed high contents of MOAHs for most of the oils, with percentages as high as 57%. The MOAH fractions were then analyzed further via two-dimensional GC (data not shown, see S1 Fig for exemplary online-LC-GC-FID and GCxGC-ToF-MS chromatograms). The data highlighted differences in the composition of some of the MOAH fractions. These include, for example, exceptionally high-molecular weight compounds present in MO 4 as indicated by the later retention time in the melting point dimension of the two-dimensional GC. In addition high percentages of substituted PAHs were detected in MOs 9 and 13 (S1 Fig). Other components detected were alkylated benzenes, alkylated and partly hydrogenated naphthalenes and traces of unsubstituted or low alkylated three ring systems. However, although the online-LC-GC-FID and GCxGC-ToF-MS chromatograms of the respective MOAH fractions show a certain degree of similarity the spectral fingerprints are quite different. Altogether, comparison of the analytical results with the xenoestrogenic activity showed a clear correlation of the latter with the percentage of MOAHs being present in the MO (Fig 2). This comprised gene expression levels ( $r^2 = 0.91, 0.68$  and  $0.85$  for *PGR*, *TFF1* and *GREB*, respectively) as well as data from the E-screen at 0.1  $\mu$ l/ml and the luciferase assay ( $r^2 = 0.61$  and  $0.87$ , respectively).

**Table 1. Percentages of MOAHs and carbon range of MOSHs and MOAHs from the various MOs as determined by online-LC-GC-FID analysis.** n.d. = not detectable.

| MO | MOAHs [%] | MOSH range | MOAH range |
|----|-----------|------------|------------|
| 1  | 27.3      | C14-C24    | C14-C24    |
| 2  | 25.7      | C13-C28    | C14-C29    |
| 3  | n.d.      | C10-C18    | -          |
| 4  | 25.7      | C13-C34    | C13-C34    |
| 5  | n.d.      | <C16       | -          |
| 6  | 2.4       | C13-C22    | C14-C21    |
| 7  | 1.9       | C13-C20    | C14-C21    |
| 8  | 1.5       | C12-C22    | C13-C18    |
| 9  | 20.5      | C13-C21    | C13-C21    |
| 10 | 16.3      | C13-C20    | C13-C26    |
| 11 | 18.4      | C13-C21    | C12-C22    |
| 12 | 28.1      | C13-C23    | C13-C22    |
| 13 | 57.1      | C13-C23    | C13-C23    |
| 14 | 54.8      | C13-C22    | C12-C21    |
| 15 | 48.9      | C13-C21    | C12-C20    |

doi:10.1371/journal.pone.0147239.t001

### Estrogenic potential of MOSHs and MOAHs

The assumption that the xenostrogenicity of MOs is mediated by compounds of the MOAH fraction was tested further by comparing the endocrine activities of MOSHs and MOAHs from an exemplary oil, namely MO 1. The respective fractions were isolated by preparative HPLC using consecutive sample injections and a hexane/dichloromethane gradient. Preparations for negative controls consisted of mock hexane injections which were separated using the same program and are henceforth referred to as 'blank MOSH' and 'blank MOAH', respectively.

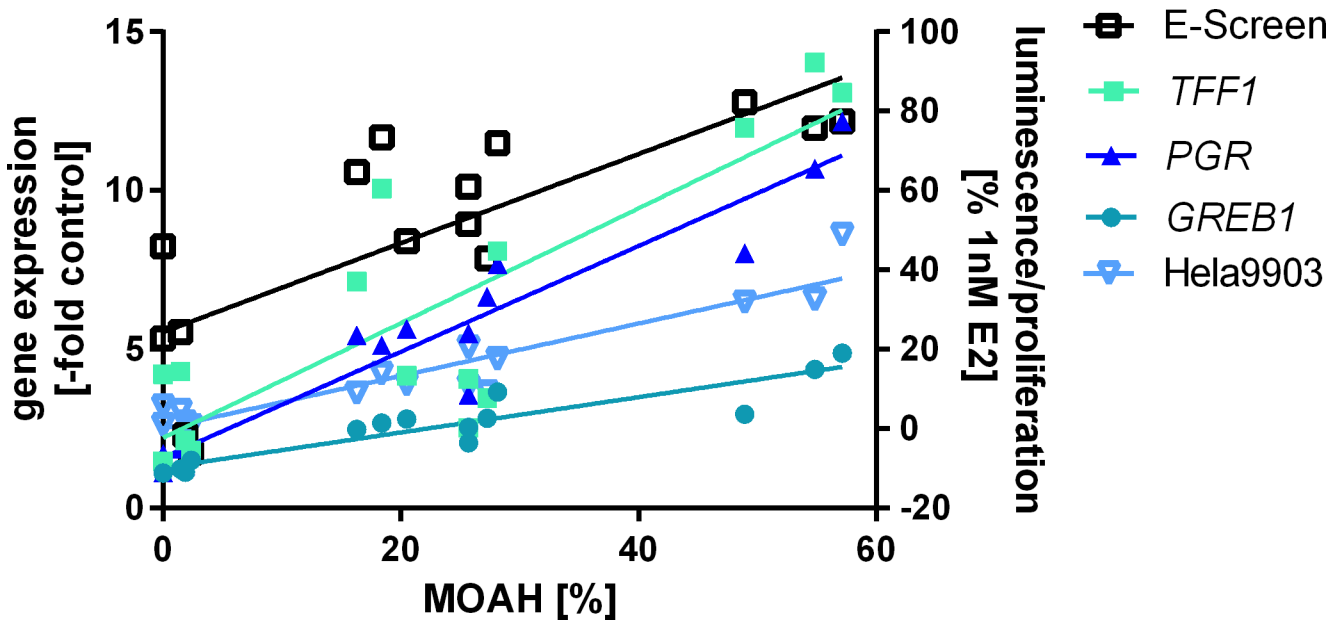

**Fig 2. Correlation of estrogenic effects with MOAH percentage.** Results from the estrogen assays correlated well with the percentage of MOAHs being present in MOs. For the E-screen data from exposure to 0.1  $\mu$ l/ml MO was used.

doi:10.1371/journal.pone.0147239.g002

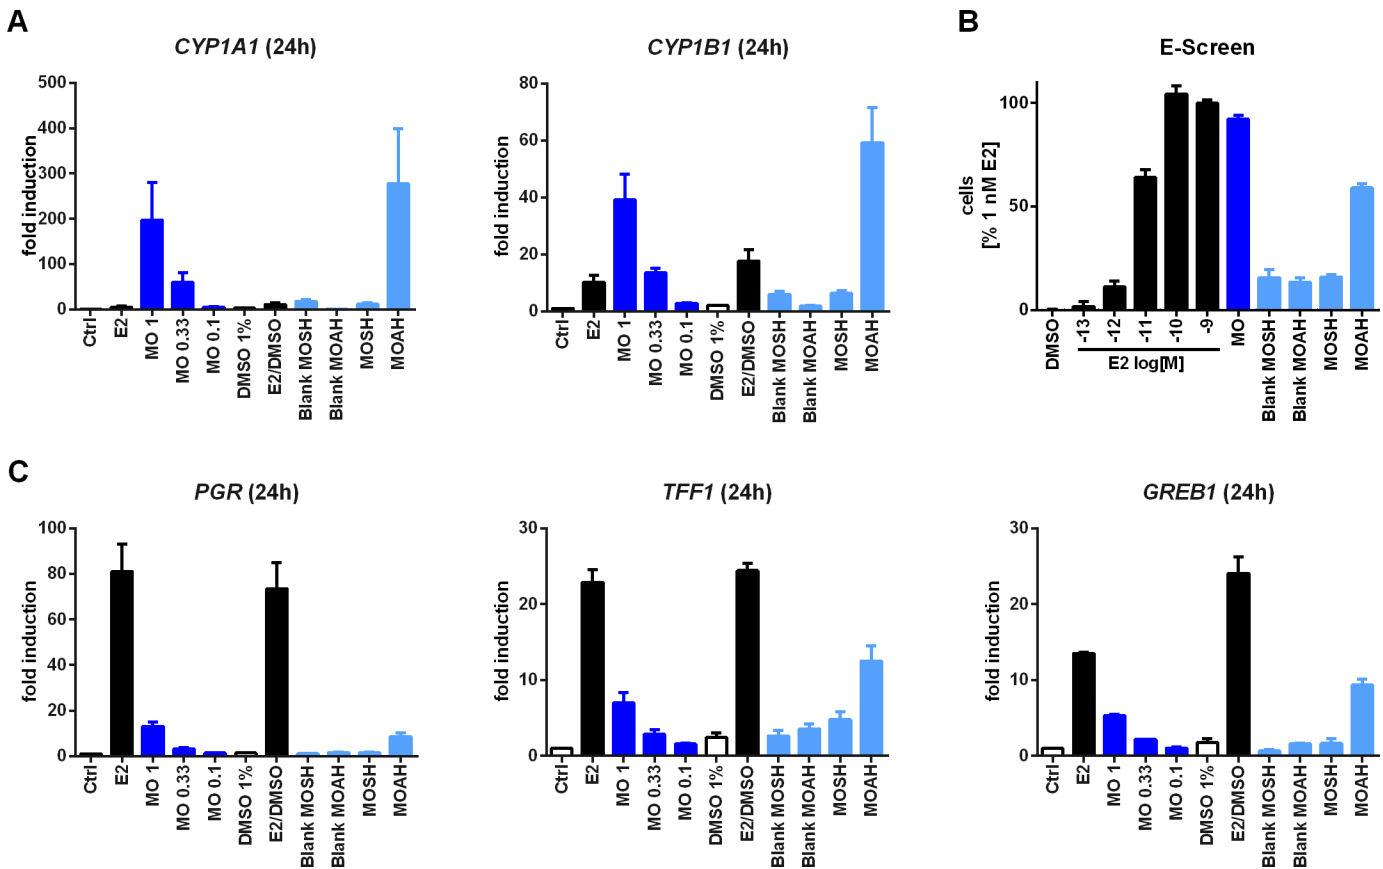

**Fig 3. Analytical separation and subsequent analysis of MOSH and MOAH fractions from MO 1.** Transcriptional analysis of *CYP1A1* and *1B1* was used as a biological control to establish separation of MOSHs and MOAHs (A), while the E-screen (B) and estrogenic activity-dependent gene transcription (C) are readouts for xenoestrogenic potential. If not stated otherwise concentrations of E2 [M] and MO [μl/ml] were used as indicated or added as 10 nM E2. For the E-screen MOSH and MOAH fractions were added in final concentrations of 14.6 and 5.4 μg/ml, respectively, while the concentrations for the gene expression analysis were 146 μg/ml and 54 μg/ml, respectively. When fractions were diluted 1:100 for the transcriptional assays, additional positive and negative controls were applied to account for the final DMSO concentration (DMSO 1% and E2/DMSO). Relative gene expression was normalized to *RPLP0* as reference gene and to the solvent control. Graphs represent mean ± SEM from 3 independent experiments. Abbreviations: *PGR*, progesterone receptor (gene); *TFF1*, trefoil factor (gene); *GREB1*, estrogen-dependent growth regulator in breast cancer 1 (gene); *CYP1A1/1B1* (gene), cytochrome P450-dependent monooxygenase, family 1, subfamily A/B, polypeptide 1.

doi:10.1371/journal.pone.0147239.g003

Prior to subsequent experiments transcription of the AHR responsive genes *CYP1A1* and *1B1* was used as an additional biological indicator for assessing the preparations. Cells were exposed to 146 μg/ml MOSHs and 54 μg/ml MOAHs (Fig 3A). Only the MOAH-fraction led to a visible induction of CYP1-transcripts. While not being exclusive control this indicates the carry over of aromatic substances to be low to negligible, given the usually high sensitivity of AHR-regulon for aromatic substances. Likewise expression of *CYP1A2*, another AHR target gene was only elevated following exposure to MOAH (S3 Fig). However, the respective expression levels were lower than for *CYP1A1* and *1B1*.

The estrogenic activity was tested using the E-screen (Fig 3B). The data show that the proliferative effect can be attributed to the MOAH fraction, with 5.4 μg/ml of MOAHs corresponding to about double-digit picomolar concentrations of E2. In contrast, exposure to MOSHs failed to significantly enhance cell proliferation at a concentration of 14.6 μg/ml when compared to the MOSH blank controls. Concomitantly the canonical estrogenic transcripts *PGR*, *TFF1* and *GREB* was also significantly induced by the MOAH fraction only (Fig 3C). The effect was less pronounced for the non-exclusively ERE-regulated *HSPB8* or *CTSD* (S3 Fig).



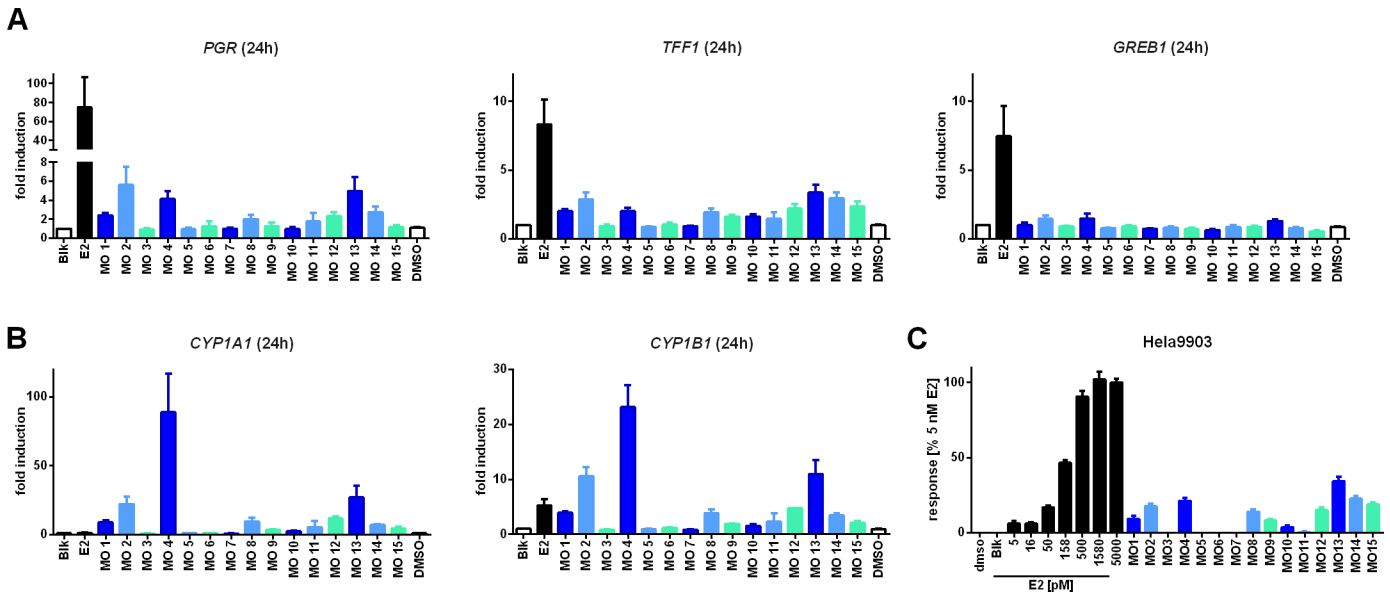

**Fig 4. Analysis of the estrogenic potential of MOAHs.** Activation of ER- (A) and AHR-dependent (B) gene transcription was measured following 24-h exposure to 1 µl/ml MOAHs or 10 nM E2, while luminescent reporter cells were subjected to 5 µl/ml MOAHs for 24 h (C). Data represent the mean ± SEM from at least three independent experiments. Again gene expression levels were normalized to the reference gene *RPLP0* and the solvent control, while luminescence values were corrected for the background activity of the solvent control and normalized using 5 nM E2 as maximal response. Blk (blank) represents the flow through of a mock sample which was treated similarly to the MOAH fractions. Abbreviations: *PGR*, progesterone receptor (gene); *TFF1*, trefoil factor (gene); *GREB1*, estrogen-dependent growth regulator in breast cancer 1 (gene); *CYP1A1/1B1* (gene), cytochrome P450-dependent monooxygenase, family 1, subfamily A/B, polypeptide 1.

doi:10.1371/journal.pone.0147239.g004

### Comparison of xenoestrogenic MOAH activity and evaluation vs. its genotoxic potential

Following the identification of MOAHs as a source for endocrine activity in MO 1, MOAH fractions of all oils were screened with regard to their potential to induce estrogenic activity-dependent gene transcription (Fig 4A) or to activate ERα (Fig 4C). It should be noted that in contrast to MO 1 these assays were performed using a ten-fold higher dilution since some MOs began showing signs of cytotoxicity or precipitated when used at higher concentrations (data not shown). Depending on the MOAH content this corresponded to up to 11.2 µg MOAH/ml, except for MO 3 and MO 5 which are MOAH-free and hence were tested using mock preparations instead. At the concentrations used none of the samples induced *GREB1*, *HSPB8* or *CTSD* (Fig 4 and S4 Fig). However, transcription of *PGR* and *TFF1* was found to be upregulated for several of the samples, particularly MOs 2, 4 and 13. The HeLa-9903 transactivation assay confirmed these results with MO 13 being as potent as 50–100 pM E2, when MOAH fractions were applied in a 1:200 dilution, corresponding to a MOAH concentration up to 22.4 µg/ml (Fig 4C).

Likewise the MOAHs from MO 2, 4 and 13 acted as strong inducers for the *CYP1A1*, *1B1* and *1A2* (Fig 4B and S4 Fig). The corresponding fractions thus not only act as xenoestrogens but are likely to also influence phase I metabolism through AHR signaling. In case of other polycyclic aromatic compounds such as benzo[*a*]pyrene (BP) this can potentially lead to the formation of genotoxic metabolites [23, 24]. Given that genotoxicity is a major concern with regard to MOs used in printing inks all oils were screened for their potential to induce *CYP1A1*, *1B1* and *1A2* (Fig 5A, S2 Fig), followed by the comet assay for some selected oils. However, in comparison to the positive controls BP (DNA damaging upon CYP-dependent activation) and

methyl methanesulfonate (MMS; directly alkylating), from the major CYP inducers only MO 9 and 13 showed some weak genotoxic potential (Fig 5B).

## Discussion

Given their widespread use and consumer exposure the toxicological properties of MOs in printing inks have been a matter of scientific and regulatory debate [8]. Yet, the focus has so far been systemic toxicity or genotoxicity rather than potential endocrine effects. This is the first time that MOs were systematically assessed as potential endocrine disruptors. Indeed the majority of oils were found to exert some estrogenic effects *in vitro*, be it on the transcriptional level, by activation of the ER $\alpha$  or by stimulating estrogen-dependent cell proliferation of MCF-7 cells. Thereby, the estrogenic activity correlates well with the percentage of MOAHs in the respective MOs, a finding that was confirmed further by separate analysis of the effects of the individual MOSH and MOAH fractions, respectively. However, compared to E2 MO-featured hormonal activity was subject to notable variation, particularly between the different assays. Although all assays used are based on human cell lines each assay is based on a different principle and is thus prone to inherent limitations. These are for example an increased risk for cytotoxicity as a consequence of prolonged exposure during the E-screen, the possibility of direct substance interactions with firefly luciferase in the reporter gene assay [15, 25], or unspecific transcriptional effects. While this necessarily limits the predictivity of each assay and explains the observed variability, it is unlikely that one and the same compound or compound mixture will produce false-positive readouts in several assays. Out of the 15 MOs tested 10 triggered estrogenic responses in all assays used, that is MOs 1, 2, 4, 8, 9, 10, 12, 13, 14 and 15. It should be noted that all of these MOs contained MOAHs at percentages of 16% or higher, whereas samples with lower amounts of MOAHs tended to be less clear in their response. Even though these results clearly indicate a potential hazard it is difficult to assess any estrogenic potency. In the E-screen several MOs produced effects equivalent to E2 at high picomolar concentrations. Yet, as a cellular assay this screen integrates various processes in the cell [26] and thus can be affected by cytotoxicity or physiological bias unrelated to estrogen signaling. Similarly the RNA levels of well-established estrogen responsive genes such as *TFF1* [27] can be subject to cross-regulation by phorbol esters and growth factors, the latter acting synergistically with E2 [28, 29]. Nevertheless, it should be noted that all MOs tested have a low solubility and were added to the assays at dilutions ranging from 1:1000 to 1:10,000. Moreover, the respective MOAH

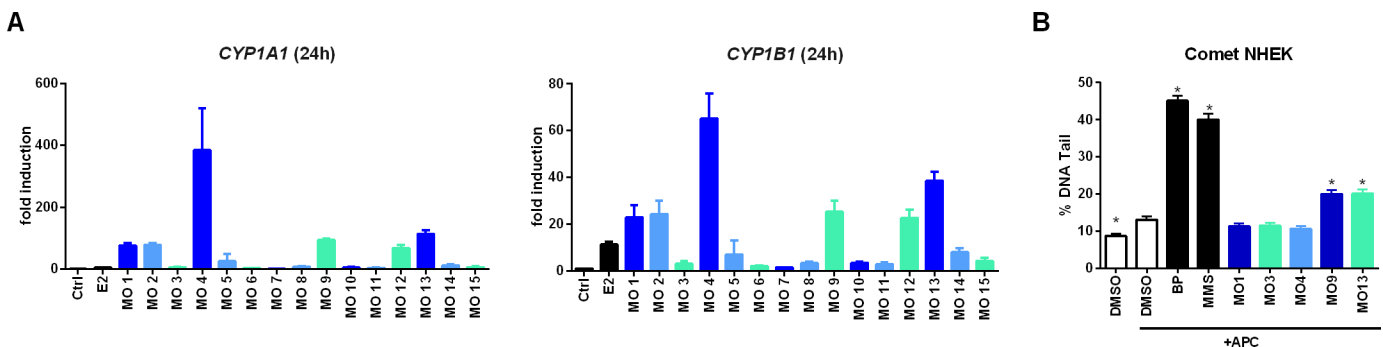

**Fig 5. CYP induction and DNA damage caused by various MOs.** Activation of AHR-dependent gene transcription in MCF-7 cells was measured following 24-h exposure to 1  $\mu$ l/ml dispersed MO or 10 nM E2 (A). Data represent the mean  $\pm$  SEM from at least three independent experiments. Gene expression levels were normalized to the reference gene *RPLP0* and the solvent control. For the comet assay (B), NHEKs were exposed to 1  $\mu$ l/ml of dispersed MO, 3  $\mu$ M benzo[a]pyrene (BP) or 20  $\mu$ M methyl methanesulfonate (MMS) in presence of aphidicolin (APC). The resulting DNA damage was analyzed using an alkaline comet assay and quantified based on % DNA detected in the comet tails. Data represent the mean  $\pm$  SEM of three independent experiments with cells from two individual donors resulting in 300 analyzed cells (\* statistically significant ( $P < 0.05$ ) with respect to the APC/DMSO control as assessed by the Dunnett's test). Abbreviations: *CYP1A1/1B1* (gene), cytochrome P450-dependent monooxygenase, family 1, subfamily A/B, polypeptide 1.

doi:10.1371/journal.pone.0147239.g005

fractions are complex mixtures comprising several hundred different compounds. With only a fraction of these being likely to act as xenoestrogens the latter must be sufficiently potent in order to trigger a measurable signal.

Contrary to the situation seen with the genes controlled by the ER expression of the AHR target genes *CYP1A1* and *CYP1B1* did not generally correlate with MOAH contents (data not shown). This is exemplified by the fact that PAH-containing oils such as MO 4 induced a strong gene response, while other MOAH-rich oils like MO 14 and MO 15 failed to do so. The observed AHR activity of some oils prompted us to investigate genotoxic effects by applying a modified comet assay. As it is known for higher molecular weight PAHs such as BP, AHR activation induces CYP expression and thus conversion of PAHs to DNA reactive metabolites (e.g., diol epoxides). We indeed observed some genotoxic effects for some oils, however MO 4, which showed the highest AHR activation resp. CYP1 induction, did not induce DNA strand breaks or adducts leading to nucleotide excision repair detectable in the comet assay (Fig 5). In contrast MO 9 and MO 13, which induced a much weaker CYP expression compared to MO 4, significantly increased the percent tail DNA in the modified comet assay. MO 13 was also the oil with the highest MOAH content consisting mainly of alkylated naphthalenes and traces of alkylated three ring molecules. It has been shown, that naphthalene does not activate AHR in Hepa-1 cells and that AHR knockout mice are not protected from naphthalene-mediated toxicity [30]. Results concerning genotoxicity of naphthalene are controversial when *in vitro* and *in vivo* assays are compared [31]. Moreover, genetic toxicity of alkylated naphthalenes is scarcely investigated. However, for some higher molecular PAHs, the alkylated molecules showed an increased carcinogenic potency when compared to their non-alkylated counterparts [32, 33].

An activated AHR is known to potentially interfere with estrogen signaling. Known mechanisms comprise recruitment of shared transcriptional cofactors, upregulation of estrogen metabolizing enzymes or direct protein-protein interaction with ERs [34]. The latter not only results in the recruitment of ER to AHR target promoters and *vice versa* but also to proteasomal degradation of the ER, which in turn will inhibit estrogen signaling [35–38]. Thus estrogenic readouts can be dampened in mixtures with high AHR activity.

Most known (xeno)estrogens contain phenolic residues (*i.e.*, bisphenol A, nonylphenols, diethylstilbestrol, parabens and benzophenones as well as the endogenous E2), which in fact seems to be a prerequisite for ER binding [39]. Hence one might speculate the MOAH fraction to contain phenolic xenoestrogens as such or some metabolic precursors thereof. Indeed it has been shown that some PAHs (*i.e.*, BP or 3-methylcholanthrene) require hydroxylation prior to ER activation [40, 41], while others bind to the ER $\alpha$  directly [42]. Due to the high number of individual compounds present in MOs currently one can only but speculate about which classes of compounds are responsible for the estrogenic activities. The most active oil, MO 13, mainly contains alkylated benzenes and alkylated naphthalenes, but traces of three ring PAHs were also detected.

The MOAH-induced effects of MO 1 occurred at 54 mg/l and 5.4 mg/l (cf. Fig 3A and 3B). This corresponds to concentrations found in foodstuffs with ranges from more than 1 to 60 mg of MOAH/kg foodstuff, respectively [3]. Also, migration studies with packages made from recycled paperboard have shown that storage of several months will typically lead to 2.8–9.4 mg MOAH/kg dry food [4, 43]. Overall there are few reports regarding the estrogenic effects of MOAH-containing MOs. Vabrie *et al.* investigated the effects of crude and refined oils in MCF7 cells, reporting up-regulation of *TFPI* and increased cell proliferation at 25 mg/l [44]. Likewise experiments in zebrafish suggest that crude oils might affect the endocrine system by disrupting steroidogenesis [45]. However, the activation of hormone receptors has not been studied in this context nor has the role of MOs in previous studies on AHR activation and estrogenic potential in paper extracts [46, 47].

Altogether it appears that MOs used in printing inks contain potential endocrine disruptors. In absence of more detailed data on MO-composition, -kinetics and metabolism this has to be

seen as a potential hazard and one should assess carefully if and to what extent they might contribute to the total estrogenic burden in humans. Moreover, any comprehensive risk assessment of these oils will have to address their effects as mixtures and, ideally, establish the quantitative dose effect relationship of the single substances contained therein.

## Supporting Information

**S1 Fig. GCxGC-ToF-MS und online-LC-GC-FID chromatograms of 3 selected MOs.** Isolated MOAH fractions were subjected to GCxGC-ToF-MS analysis (MO 4: A, MO 9: B, MO 13: C). The x-axis shows separation according to the boiling point, the y-axis separation due to polarity. The relative intensity is represented by the color scale. The regions for different classes of compounds (alkylated benzenes, naphthalenes and 3-ring systems) are marked in the chromatograms by a pink, green and orange grid, respectively. The chromatographic fingerprints of naphthalene fractions and corresponding mass spectra clearly indicate partial hydrogenation of constituents in all MOs shown (MO 4, 9 and 13). The corresponding online-LC-GC-FID chromatograms are depicted in part D (MO 4), E (MO 9), and F (MO 13), respectively. They reveal characteristic fingerprints for each oil and highlight the higher molecular components of MO 4 in contrast to MO 9 and MO13.

(TIF)

**S2 Fig. Effects of MOs on ER or AHR responsive transcripts.** Hormone starved MCF7 cells were treated with 1 g/l MO or 10 nM E2 for 24 h. Gene expression was quantified by Real-Time PCR. Data in all assays represent the mean  $\pm$  SEM from at least three independent experiments. Gene expression was normalized using *RPLP0* and the solvent control as references. Abbreviations: *HSPB8*, heat shock protein family B (small) member 8 (gene), *CTSD*, cathepsin D (gene), *CYP1A2*, cytochrome P450 family 1 subfamily A member 2 (gene).

(TIF)

**S3 Fig. Effects of MOSH and MOAH fractions from MO 1 on ER and AHR responsive transcripts.** MO1 was diluted as indicated [ $\mu$ l/ml]. Fractions were diluted 1:100 and additional positive and negative controls were applied to account for the final DMSO concentration (DMSO 1% and E2/DMSO). Relative gene expression was normalized to *RPLP0* as reference gene and to the solvent control. Graphs represent mean  $\pm$  SEM from 3 independent experiments. Abbreviations: *HSPB8*, heat shock protein family B (small) member 8 (gene), *CTSD*, cathepsin D (gene), *CYP1A2*, cytochrome P450 family 1 subfamily A member 2 (gene).

(TIF)

**S4 Fig. Effects of MOAH fractions from different MOs on ER and AHR responsive transcripts.** Activation of ER- and AHR-dependent gene transcription was measured following 24-h exposure to 1  $\mu$ l/ml MOAHs or 10 nM E2. Data represent the mean  $\pm$  SEM from at least three independent experiments. Again gene expression levels were normalized to the reference gene *RPLP0* and the solvent control. Abbreviations: *HSPB8*, heat shock protein family B (small) member 8 (gene), *CTSD*, cathepsin D (gene), *CYP1A2*, cytochrome P450 family 1 subfamily A member 2 (gene).

(TIF)

## Acknowledgments

We thank the Chemical and Veterinary Investigations Office, Stuttgart (Germany) and the Official Food Control Authority of the Canton of Zürich (Switzerland) for providing the oils.

## Author Contributions

Conceived and designed the experiments: PT CH TT. Performed the experiments: PT SG KS. Analyzed the data: PT CH TT. Contributed reagents/materials/analysis tools: CH. Wrote the paper: PT CH TT AL.

## References

1. EuPIA. CEPE annual report. 2013.
2. Biedermann M, Uematsu Y, Grob K. Mineral Oil Contents in Paper and Board Recycled to Paperboard for Food Packaging. *Packag Technol Sci*. 2011; 24(2):61–73. doi: [10.1002/Pts.914](https://doi.org/10.1002/Pts.914) PMID: [WOS:000288175800001](https://pubmed.ncbi.nlm.nih.gov/23406500/).
3. Biedermann M, Fiselier K, Grob K. Aromatic hydrocarbons of mineral oil origin in foods: method for determining the total concentration and first results. *J Agric Food Chem*. 2009; 57(19):8711–21. doi: [10.1021/jf901375e](https://doi.org/10.1021/jf901375e) PMID: [19728727](https://pubmed.ncbi.nlm.nih.gov/19728727/)
4. Lorenzini R, Biedermann M, Grob K, Garbini D, Barbanera M, Braschi I. Migration kinetics of mineral oil hydrocarbons from recycled paperboard to dry food: monitoring of two real cases. *Food additives & contaminants Part A, Chemistry, analysis, control, exposure & risk assessment*. 2013; 30(4):760–70. doi: [10.1080/19440049.2013.766765](https://doi.org/10.1080/19440049.2013.766765) PMID: [23406500](https://pubmed.ncbi.nlm.nih.gov/23406500/).
5. Vollmer A, Biedermann M, Grundbock F, Ingenhoff JE, Biedermann-Brem S, Altkofer W, et al. Migration of mineral oil from printed paperboard into dry foods: survey of the German market. *Eur Food Res Technol*. 2011; 232(1):175–82. doi: [10.1007/s00217-010-1376-6](https://doi.org/10.1007/s00217-010-1376-6) PMID: [WOS:000286465700021](https://pubmed.ncbi.nlm.nih.gov/200286465700021/).
6. Grob K, Biedermann M, Caramaschi A, Pacciarelli B. LC-GC analysis of the aromatics in a mineral oil fraction: Batching oil for jute bags. *Journal of High Resolution Chromatography*. 1991; 14(1):33–9. doi: [10.1002/jhrc.1240140109](https://doi.org/10.1002/jhrc.1240140109)
7. Biedermann M, Grob K. On-line coupled high performance liquid chromatography–gas chromatography for the analysis of contamination by mineral oil. Part 1: Method of analysis. *Journal of Chromatography A*. 2012; 1255(0):56–75. doi: <http://dx.doi.org/10.1016/j.chroma.2012.05.095>.
8. EFSA. Scientific Opinion on Mineral Oil Hydrocarbons in Food. *EFSA Journal*. 2012; 10(6).
9. Bergman AK, Heindel JJ, Jobling S, Kidd KA, Zoeller RT. The State of the Science of Endocrine Disrupting Chemicals. World Health Organization. 2012.
10. Heldring N, Pike A, Andersson S, Matthews J, Cheng G, Hartman J, et al. Estrogen receptors: how do they signal and what are their targets. *Physiol Rev*. 2007; 87(3):905–31. PMID: [17615392](https://pubmed.ncbi.nlm.nih.gov/17615392/)
11. Couse JF, Korach KS. Estrogen receptor null mice: what have we learned and where will they lead us? *Endocrine reviews*. 1999; 20(3):358–417. doi: [10.1210/edrv.20.3.0370](https://doi.org/10.1210/edrv.20.3.0370) PMID: [10368776](https://pubmed.ncbi.nlm.nih.gov/10368776/).
12. Deroo BJ, Korach KS. Estrogen receptors and human disease. *The Journal of clinical investigation*. 2006; 116(3):561–70. doi: [10.1172/JCI27987](https://doi.org/10.1172/JCI27987) PMID: [16511588](https://pubmed.ncbi.nlm.nih.gov/16511588/); PubMed Central PMCID: [PMC2373424](https://pubmed.ncbi.nlm.nih.gov/PMC2373424/).
13. Shanle EK, Xu W. Endocrine disrupting chemicals targeting estrogen receptor signaling: identification and mechanisms of action. *Chem Res Toxicol*. 2011; 24(1):6–19. doi: [10.1021/tx100231n](https://doi.org/10.1021/tx100231n) PMID: [21053929](https://pubmed.ncbi.nlm.nih.gov/21053929/); PubMed Central PMCID: [PMC3119362](https://pubmed.ncbi.nlm.nih.gov/PMC3119362/).
14. Evans RM, Scholze M, Kortenkamp A. Additive mixture effects of estrogenic chemicals in human cell-based assays can be influenced by inclusion of chemicals with differing effect profiles. *PLoSOne*. 2012; 7(8):e43606.
15. Tarnow P, Tralau T, Hunecke D, Luch A. Effects of triclocarban on the transcription of estrogen, androgen and aryl hydrocarbon receptor responsive genes in human breast cancer cells. *Toxicol In Vitro*. 2013; 27(5):1467–75. doi: [10.1016/j.tiv.2013.03.003](https://doi.org/10.1016/j.tiv.2013.03.003) PMID: [23524099](https://pubmed.ncbi.nlm.nih.gov/23524099/)
16. Sutter CH, Yin H, Li Y, Mammen JS, Bodreddigari S, Stevens G, et al. EGF receptor signaling blocks aryl hydrocarbon receptor-mediated transcription and cell differentiation in human epidermal keratinocytes. *Proc Natl Acad Sci U S A*. 2009; 106(11):4266–71. doi: [10.1073/pnas.0900874106](https://doi.org/10.1073/pnas.0900874106) PMID: [19255421](https://pubmed.ncbi.nlm.nih.gov/19255421/); PubMed Central PMCID: [PMC2649958](https://pubmed.ncbi.nlm.nih.gov/PMC2649958/).
17. Brinkmann J, Stolpmann K, Trappe S, Otter T, Genkinger D, Bock U, et al. Metabolically competent human skin models: activation and genotoxicity of benzo[a]pyrene. *Toxicol Sci*. 2013; 131(2):351–9. doi: [10.1093/toxsci/kfs316](https://doi.org/10.1093/toxsci/kfs316) PMID: [23148024](https://pubmed.ncbi.nlm.nih.gov/23148024/); PubMed Central PMCID: [PMC3551429](https://pubmed.ncbi.nlm.nih.gov/PMC3551429/).
18. Kangaspeska S, Stride B, Metivier R, Polycarpou-Schwarz M, Ibberson D, Carmouche RP, et al. Transient cyclical methylation of promoter DNA. *Nature*. 2008; 452(7183):112–5. doi: [10.1038/nature06640](https://doi.org/10.1038/nature06640) PMID: [18322535](https://pubmed.ncbi.nlm.nih.gov/18322535/).

19. Sun J, Nawaz Z, Slingerland JM. Long-range activation of GREB1 by estrogen receptor via three distal consensus estrogen-responsive elements in breast cancer cells. *Mol Endocrinol*. 2007; 21(11):2651–62. doi: [10.1210/me.2007-0082](https://doi.org/10.1210/me.2007-0082) PMID: [17666587](https://pubmed.ncbi.nlm.nih.gov/17666587/).
20. Boney-Montoya J, Ziegler YS, Curtis CD, Montoya JA, Nardulli AM. Long-range transcriptional control of progesterone receptor gene expression. *Mol Endocrinol*. 2010; 24(2):346–58. doi: [10.1210/me.2009-0429](https://doi.org/10.1210/me.2009-0429) PMID: [19952285](https://pubmed.ncbi.nlm.nih.gov/19952285/); PubMed Central PMCID: [PMC2817601](https://pubmed.ncbi.nlm.nih.gov/pmc/PMC2817601/).
21. Bretschneider N, Kangaspekka S, Seifert M, Reid G, Gannon F, Denger S. E2-mediated cathepsin D (CTSD) activation involves looping of distal enhancer elements. *Mol Oncol*. 2008; 2(2):182–90. doi: [10.1016/j.molonc.2008.05.004](https://doi.org/10.1016/j.molonc.2008.05.004) PMID: [19383337](https://pubmed.ncbi.nlm.nih.gov/19383337/).
22. Madak-Erdogan Z, Kieser KJ, Kim SH, Komm B, Katzenellenbogen JA, Katzenellenbogen BS. Nuclear and extranuclear pathway inputs in the regulation of global gene expression by estrogen receptors. *Molecular Endocrinology*. 2008; 22(9):2116–27. doi: [10.1210/me.2008-0059](https://doi.org/10.1210/me.2008-0059) PMID: [18617595](https://pubmed.ncbi.nlm.nih.gov/18617595/)
23. Nebert DW, Dalton TP, Okey AB, Gonzalez FJ. Role of aryl hydrocarbon receptor-mediated induction of the CYP1 enzymes in environmental toxicity and cancer. *J Biol Chem*. 2004; 279(23):23847–50. PMID: [15028720](https://pubmed.ncbi.nlm.nih.gov/15028720/)
24. Luch A. Nature and nurture—lessons from chemical carcinogenesis. *Nat Rev Cancer*. 2005; 5(2):113–25. doi: [10.1038/nrc1546](https://doi.org/10.1038/nrc1546) PMID: [15660110](https://pubmed.ncbi.nlm.nih.gov/15660110/).
25. Thorne N, Shen M, Lea WA, Simeonov A, Lovell S, Auld DS, et al. Firefly luciferase in chemical biology: a compendium of inhibitors, mechanistic evaluation of chemotypes, and suggested use as a reporter. *Chem Biol*. 2012; 19(8):1060–72. doi: [10.1016/j.chembiol.2012.07.015](https://doi.org/10.1016/j.chembiol.2012.07.015) PMID: [22921073](https://pubmed.ncbi.nlm.nih.gov/22921073/)
26. Soto AM, Sonnenschein C, Chung KL, Fernandez MF, Olea N, Serrano FO. The E-SCREEN assay as a tool to identify estrogens: an update on estrogenic environmental pollutants. *Environ Health Perspect*. 1995; 103 Suppl 7:113–22. PMID: [8593856](https://pubmed.ncbi.nlm.nih.gov/8593856/)
27. Masiakowski P, Breathnach R, Bloch J, Gannon F, Krust A, Chambon P. Cloning of cDNA sequences of hormone-regulated genes from the MCF-7 human breast cancer cell line. *Nucleic acids research*. 1982; 10(24):7895–903. PMID: [6897676](https://pubmed.ncbi.nlm.nih.gov/6897676/); PubMed Central PMCID: [PMC327057](https://pubmed.ncbi.nlm.nih.gov/pmc/PMC327057/).
28. Beck S, Fegert P, Gott P. Factors regulating pS2-reporter gene expression in MCF-7 breast cancer cell line. *Int J Oncol*. 1997; 10(5):1051–5. PMID: [21533484](https://pubmed.ncbi.nlm.nih.gov/21533484/).
29. Cavailles V, Garcia M, Rochefort H. Regulation of cathepsin-D and pS2 gene expression by growth factors in MCF7 human breast cancer cells. *MolEndocrinol*. 1989; 3(3):552–8.
30. Genter MB, Marlowe J, Kevin Kerzee J, Dragin N, Puga A, Dalton TP, et al. Naphthalene toxicity in mice and aryl hydrocarbon receptor-mediated CYPs. *Biochem Biophys Res Commun*. 2006; 348(1):120–3. doi: [10.1016/j.bbrc.2006.07.025](https://doi.org/10.1016/j.bbrc.2006.07.025) PMID: [16876762](https://pubmed.ncbi.nlm.nih.gov/16876762/).
31. Schreiner CA. Genetic toxicity of naphthalene: a review. *J Toxicol Environ Health B Crit Rev*. 2003; 6(2):161–83. doi: [10.1080/10937400306472](https://doi.org/10.1080/10937400306472) PMID: [12554433](https://pubmed.ncbi.nlm.nih.gov/12554433/).
32. Rice JE, Rivenson A, Braley J, LaVoie EJ. Methylated derivatives of pyrene and fluorene: evaluation of genotoxicity in the hepatocyte/DNA repair test and tumorigenic activity in newborn mice. *J Toxicol Environ Health*. 1987; 21(4):525–32. doi: [10.1080/15287398709531040](https://doi.org/10.1080/15287398709531040) PMID: [3599094](https://pubmed.ncbi.nlm.nih.gov/3599094/).
33. Coombs MM, Dixon C, Kissonerghis AM. Evaluation of the mutagenicity of compounds of known carcinogenicity, belonging to the benz[a]anthracene, chrysene, and cyclopenta[a]phenanthrene series, using Ames's test. *Cancer Res*. 1976; 36(12):4525–9. PMID: [793712](https://pubmed.ncbi.nlm.nih.gov/793712/).
34. Safe S, Wörmke M. Inhibitory aryl hydrocarbon receptor-estrogen receptor alpha cross-talk and mechanisms of action. *Chem Res Toxicol*. 2003; 16(7):807–16. doi: [10.1021/tx034036r](https://doi.org/10.1021/tx034036r) PMID: [12870882](https://pubmed.ncbi.nlm.nih.gov/12870882/).
35. Wormke M, Stoner M, Saville B, Walker K, Abdelrahim M, Burghardt R, et al. The aryl hydrocarbon receptor mediates degradation of estrogen receptor alpha through activation of proteasomes. *MolCell Biol*. 2003; 23(6):1843–55.
36. Zacharewski TR, Bondy KL, McDonell P, Wu ZF. Antiestrogenic effect of 2,3,7,8-tetrachlorodibenzo-p-dioxin on 17 beta-estradiol-induced pS2 expression. *Cancer Res*. 1994; 54(10):2707–13. PMID: [8168101](https://pubmed.ncbi.nlm.nih.gov/8168101/)
37. Ahmed S, Valen E, Sandelin A, Matthews J. Dioxin Increases the Interaction Between Aryl Hydrocarbon Receptor and Estrogen Receptor Alpha at Human Promoters. *Toxicological Sciences*. 2009; 111(2):254–66. doi: [10.1093/toxsci/kfp144](https://doi.org/10.1093/toxsci/kfp144) PMID: [19574409](https://pubmed.ncbi.nlm.nih.gov/19574409/)
38. Klinge CM, Bowers JL, Kulakosky PC, Kamboj KK, Swanson HI. The aryl hydrocarbon receptor (AHR)/AHR nuclear translocator (ARNT) heterodimer interacts with naturally occurring estrogen response elements. *Mol Cell Endocrinol*. 1999; 157(1–2):105–19. PMID: [10619402](https://pubmed.ncbi.nlm.nih.gov/10619402/).
39. Fang H, Tong W, Shi LM, Blair R, Perkins R, Branham W, et al. Structure-activity relationships for a large diverse set of natural, synthetic, and environmental estrogens. *Chem Res Toxicol*. 2001; 14(3):280–94. PMID: [11258977](https://pubmed.ncbi.nlm.nih.gov/11258977/).

40. Gozgit JM, Nestor KM, Fasco MJ, Pentecost BT, Arcaro KF. Differential action of polycyclic aromatic hydrocarbons on endogenous estrogen-responsive genes and on a transfected estrogen-responsive reporter in MCF-7 cells. *Toxicol Appl Pharmacol*. 2004; 196(1):58–67. PMID: [15050408](#)
41. Charles GD, Bartels MJ, Zacharewski TR, Gollapudi BB, Freshour NL, Carney EW. Activity of benzo[a]pyrene and its hydroxylated metabolites in an estrogen receptor-alpha reporter gene assay. *Toxicol Sci*. 2000; 55(2):320–6. PMID: [10828263](#)
42. Vondracek J, Kozubik A, Machala M. Modulation of estrogen receptor-dependent reporter construct activation and G0/G1-S-phase transition by polycyclic aromatic hydrocarbons in human breast carcinoma MCF-7 cells. *Toxicol Sci*. 2002; 70(2):193–201. PMID: [12441364](#).
43. Biedermann M, Ingenhoff JE, Zurfluh M, Richter L, Simat T, Harling A, et al. Migration of mineral oil, photoinitiators and plasticisers from recycled paperboard into dry foods: a study under controlled conditions. *Food AdditContam Part A Chem Anal Control ExpoRisk Assess*. 2013; 30(5):885–98.
44. Vrabie CM, Candido A, van den Berg H, Murk AJ, van Duursen MB, Jonker MT. Specific in vitro toxicity of crude and refined petroleum products: 3. Estrogenic responses in mammalian assays. *Environ Toxicol Chem*. 2011; 30(4):973–80. doi: [10.1002/etc.463](#) PMID: [21309018](#)
45. Salaberria I, Brakstad OG, Olsen AJ, Nordtug T, Hansen BH. Endocrine and AhR-CYP1A pathway responses to the water-soluble fraction of oil in zebrafish (*Danio rerio* Hamilton). *Journal of toxicology and environmental health Part A*. 2014; 77(9–11):506–15. doi: [10.1080/15287394.2014.886983](#) PMID: [24754388](#).
46. Vinggaard AM, Korner W, Lund KH, Bolz U, Petersen JH. Identification and quantification of estrogenic compounds in recycled and virgin paper for household use as determined by an in vitro yeast estrogen screen and chemical analysis. *Chem Res Toxicol*. 2000; 13(12):1214–22. PMID: [11123961](#).
47. Bohonowych JE, Zhao B, Timme-Laragy A, Jung D, Di Giulio RT, Denison MS. Newspapers and newspaper ink contain agonists for the ah receptor. *Toxicol Sci*. 2008; 102(2):278–90. doi: [10.1093/toxsci/kfn011](#) PMID: [18203687](#); PubMed Central PMCID: PMC2855230.
